# Supplementary material
Source: MDPI journal article supplement (https://www.mdpi.com/2072-4292/15/18/4445)
Supplement: s1 [file s1]

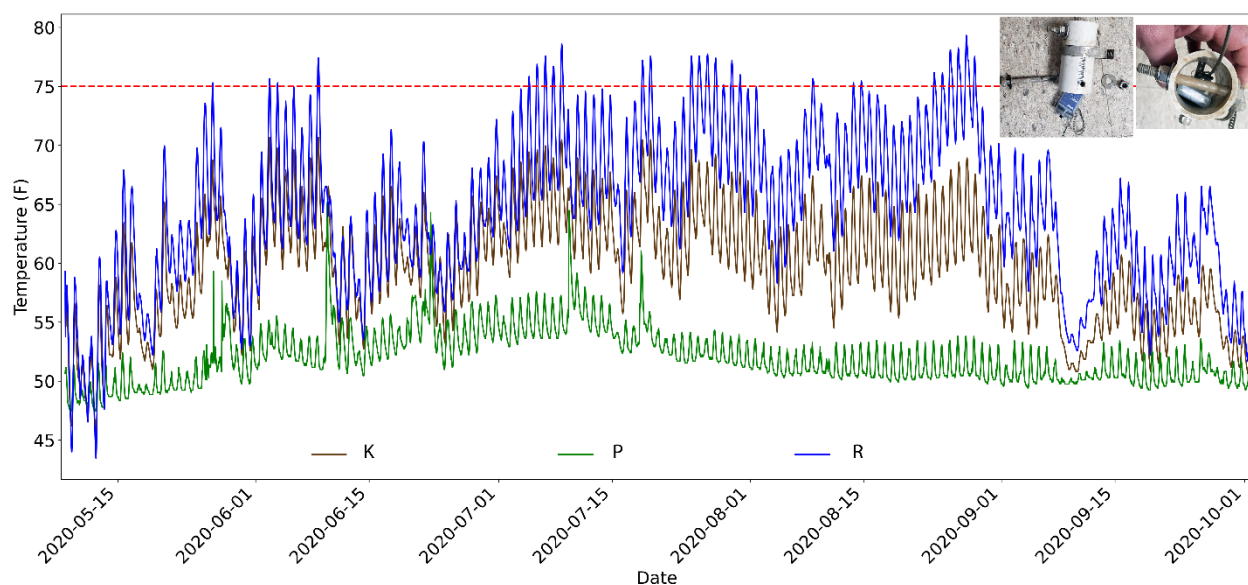

**Figure S1.** In situ obtained temperature profile for three selected locations. The locations K and P meet the State of Iowa coldwater stream designation criteria (maximum summer temperature < 75 degrees) while location R fails to meet this criteria.
